# Supplementary material for: Early Life Factors Influencing Children Gut Microbiota at 3.5 Years from Two French Birth Cohorts
Source: MDPI journal article supplement (doi:10.3390/microorganisms11061390), 2023-05-25
Supplement: s1 [file s1]

**Table S1. Characteristics of the study population (n = 798)**

| Maternal Characteristics                              | N (%) or Mean (SD) and median (IQR) |                      |                      |
|-------------------------------------------------------|-------------------------------------|----------------------|----------------------|
|                                                       | Pooled sample (N=798)               | ELFE (N=626)         | EPIFLORE (N=172)     |
| <b>Mother born in France</b>                          |                                     |                      |                      |
| Yes                                                   | 730 (91.5%)                         | 582 (93.0%)          | 148 (86.0%)          |
| No                                                    | 68 (8.5%)                           | 44 (7.0%)            | 24 (14.0%)           |
| <b>Maternal age (Years)</b>                           |                                     |                      |                      |
| <25                                                   | 40 (5.0%)                           | 24 (3.8%)            | 16 (9.3%)            |
| [25-35[                                               | 561 (70.3%)                         | 452 (72.2%)          | 109 (63.4%)          |
| ≥35                                                   | 188 (23.6%)                         | 150 (24.0%)          | 38 (22.1%)           |
| Missing                                               | 9 (1.1%)                            | 0 (0%)               | 9 (5.2%)             |
| <b>Maternal level of education</b>                    |                                     |                      |                      |
| < High School                                         | 49 (6.1%)                           | 11 (1.8%)            | 38 (22.1%)           |
| High school                                           | 163 (20.4%)                         | 133 (21.2%)          | 30 (17.4%)           |
| 1-2 years of tertiary education                       | 202 (25.3%)                         | 166 (26.5%)          | 36 (20.9%)           |
| ≥ 3 years of tertiary education                       | 376 (47.1%)                         | 310 (49.5%)          | 66 (38.4%)           |
| Missing                                               | 8 (1.0%)                            | 6 (1.0%)             | 2 (1.2%)             |
| <b>Household income</b>                               |                                     |                      |                      |
| <1500€                                                | 24 (3.0%)                           | 14 (2.2%)            | 10 (5.8%)            |
| [1500-4000€[                                          | 473 (59.3%)                         | 381 (60.9%)          | 92 (53.5%)           |
| ≥4000€                                                | 246 (30.8%)                         | 212 (33.9%)          | 34 (19.8%)           |
| Missing                                               | 55 (6.9%)                           | 19 (3.0%)            | 36 (20.9%)           |
| <b>Maternal BMI</b>                                   |                                     |                      |                      |
| Underweight                                           | 57 (7.1%)                           | 48 (7.7%)            | 9 (5.2%)             |
| Normal                                                | 523 (65.5%)                         | 409 (65.3%)          | 114 (66.3%)          |
| Overweight                                            | 138 (17.3%)                         | 113 (18.1%)          | 25 (14.5%)           |
| Obese                                                 | 60 (7.5%)                           | 47 (7.5%)            | 13 (7.6%)            |
| Missing                                               | 20 (2.5%)                           | 9 (1.4%)             | 11 (6.4%)            |
| <b>Children Characteristics</b>                       |                                     |                      |                      |
| <b>Sex</b>                                            |                                     |                      |                      |
| Boys                                                  | 443 (55.5%)                         | 356 (56.9%)          | 87 (50.6%)           |
| Girls                                                 | 355 (44.5%)                         | 270 (43.1%)          | 85 (49.4%)           |
| <b>Gestational age (weeks)</b>                        |                                     |                      |                      |
| Mean (SD)                                             | 37.3 (4.61)                         | 39.6 (1.35)          | 29.1 (1.97)          |
| Median [IQR]                                          | 39.3 [37.00 ; 40.29]                | 39.7 [39.00 ; 40.57] | 29.6 [27.43 ; 30.71] |
| Missing                                               | 13 (1.6%)                           | 13 (2.1%)            | 0 (0%)               |
| <b>Delivery mode</b>                                  |                                     |                      |                      |
| Vaginal                                               | 557 (69.8%)                         | 497 (79.4%)          | 60 (34.9%)           |
| Cesarean                                              | 220 (27.6%)                         | 109 (17.4%)          | 111 (64.5%)          |
| Missing                                               | 21 (2.6%)                           | 20 (3.2%)            | 1 (0.6%)             |
| <b>Early antibiotics</b>                              |                                     |                      |                      |
| No                                                    | 611 (76.6%)                         | 573 (91.5%)          | 38 (22.1%)           |
| Yes                                                   | 132 (16.5%)                         | 13 (2.1%)            | 119 (69.2%)          |
| Missing                                               | 55 (6.9%)                           | 40 (6.4%)            | 15 (8.7%)            |
| <b>Skin-to-skin practice</b>                          |                                     |                      |                      |
| Yes                                                   | 676 (84.7%)                         | 573 (91.5%)          | 103 (59.9%)          |
| No                                                    | 99 (12.4%)                          | 37 (5.9%)            | 62 (36.0%)           |
| Missing                                               | 23 (2.9%)                           | 16 (2.6%)            | 7 (4.1%)             |
| <b>Human milk consumption</b>                         |                                     |                      |                      |
| No                                                    | 146 (18.3%)                         | 141 (22.5%)          | 5 (2.9%)             |
| Yes                                                   | 576 (72.2%)                         | 440 (70.3%)          | 136 (79.1%)          |
| Missing                                               | 76 (9.5%)                           | 45 (7.2%)            | 31 (18.0%)           |
| <b>Duration of human milk consumption (in months)</b> |                                     |                      |                      |
| Mean (SD)                                             | 3.89 (5.08)                         | 3.98 (5.44)          | 3.51 (3.21)          |
| Median [IQR]                                          | 2.46 [0.23 ; 5.98]                  | 2.46 [0.03 ; 6.00]   | 2.22 [0.92 ; 5.68]   |
| Missing                                               | 76 (9.5%)                           | 45 (7.2%)            | 31 (18.0%)           |
| <b>Household siblings</b>                             |                                     |                      |                      |
| No                                                    | 327 (41.0%)                         | 274 (43.8%)          | 53 (30.8%)           |
| At least 1                                            | 439 (55.0%)                         | 345 (55.1%)          | 94 (54.7%)           |

|                                                |             |             |            |
|------------------------------------------------|-------------|-------------|------------|
| Missing                                        | 32 (4.0%)   | 7 (1.1%)    | 25 (14.5%) |
| <b>Daycare exposure</b>                        |             |             |            |
| Family                                         | 261 (32.7%) | 171 (27.3%) | 90 (52.3%) |
| Childcare assistant/Paid home help             | 418 (52.4%) | 355 (56.7%) | 63 (36.6%) |
| Daycare centre                                 | 106 (13.3%) | 87 (13.9%)  | 19 (11.0%) |
| Missing                                        | 13 (1.6%)   | 13 (2.1%)   | 0 (0%)     |
| <b>Elfe only (39.6 ± 1.35 weeks of GA)</b>     |             |             |            |
| <b>Age at global diversification</b>           |             |             |            |
| <=6 months                                     | -           | 489 (78.1%) | -          |
| >6 months                                      | -           | 65 (10.4%)  | -          |
| Missing                                        | -           | 72 (11.5%)  | -          |
| <b>Age at first vegetables introduction</b>    |             |             |            |
| <=6 months                                     | -           | 446 (71.2%) | -          |
| >6 months                                      | -           | 108 (17.3%) | -          |
| Missing                                        | -           | 72 (11.5%)  | -          |
| <b>Age at first fruits introduction</b>        |             |             |            |
| <=6 months                                     | -           | 413 (66.0%) | -          |
| >6 months                                      | -           | 142 (22.7%) | -          |
| Missing                                        | -           | 71 (11.3%)  | -          |
| <b>Age at first meat introduction</b>          |             |             |            |
| [4-6 months]                                   | -           | 111 (17.7%) | -          |
| >6 months                                      | -           | 433 (69.2%) | -          |
| Missing                                        | -           | 82 (13.1%)  | -          |
| <b>Age at first fish introduction</b>          |             |             |            |
| [4-6 months]                                   | -           | 79 (12.6%)  | -          |
| >6 months                                      | -           | 458 (73.2%) | -          |
| Missing                                        | -           | 89 (14.2%)  | -          |
| <b>PNNS-score*</b>                             |             |             |            |
| <= 7.80                                        | -           | 293 (46.8%) | -          |
| > 7.80                                         | -           | 296 (47.3%) | -          |
| Missing                                        | -           | 37 (5.9%)   | -          |
| <b>Pregnancy score*</b>                        |             |             |            |
| <= 7.75                                        | -           | 303 (48.4%) | -          |
| > 7.75                                         | -           | 286 (45.7%) | -          |
| Missing                                        | -           | 37 (5.9%)   | -          |
| <b>Antibiotics in the first year</b>           |             |             |            |
| Yes                                            | -           | 375 (59.9%) | -          |
| No                                             | -           | 242 (38.7%) | -          |
| Missing                                        | -           | 9 (1.4%)    | -          |
| <b>Environnement</b>                           |             |             |            |
| Rural                                          | -           | 180 (28.8%) | -          |
| Urban                                          | -           | 439 (70.1%) | -          |
| Missing                                        | -           | 7 (1.1%)    | -          |
| <b>Epiflore only (29.1 ± 1.97 weeks of GA)</b> |             |             |            |
| <b>Antibiotics during pregnancy</b>            |             |             |            |
| No                                             | -           | -           | 84 (48.8%) |
| Yes                                            | -           | -           | 86 (50.0%) |
| Missing                                        | -           | -           | 2 (1.2%)   |
| <b>Antibiotics during delivery</b>             |             |             |            |
| No                                             | -           | -           | 97 (56.4%) |
| Yes                                            | -           | -           | 53 (30.8%) |
| Missing                                        | -           | -           | 22 (12.8%) |

Continuous variables are given as mean (sd) and median (IQR). Distributions in categorical variable are given in numbers of events (percentage). Missing data are displayed if any. Abbreviations: BMI, Body Mass Index; PNSS, Programme National Nutrition Santé; IQR, Interquartile range .

\*Chosen cut points are median scores within the population.

**Table S2. Differential abundance testing results for factors significantly associated the gut microbiota composition in pooled sample according to three different methods**

|              | otu.id                                                 | Genus                            | Direction | adj.pvalue | mean.freq | beta    | adj.pvalue | beta    | se     | W       | adj.pvalue | beta    | se     |
|--------------|--------------------------------------------------------|----------------------------------|-----------|------------|-----------|---------|------------|---------|--------|---------|------------|---------|--------|
| Genus level  | Gestational age (<37 weeks of GA vs >= 37 weeks of GA) |                                  |           |            |           |         |            |         |        |         |            |         |        |
|              | Cluster_117                                            | Butyricicoccus                   | -         | 0.0007     | 0.0021    | -0.0086 | 0.0000     | -0.6183 | 0.1044 | -5.9225 | 0.0001     | -0.9918 | 0.1883 |
|              | Cluster_31                                             | Anaerostipes                     | -         | 0.0007     | 0.0003    | -0.0024 | 0.0000     | -0.7993 | 0.1247 | -6.4112 | 0.0000     | -1.1673 | 0.1880 |
|              | Cluster_72                                             | [Eubacterium] hallii group       | -         | 0.0007     | 0.0108    | -0.0505 | 0.0000     | -0.8436 | 0.1454 | -5.8010 | 0.0118     | -1.3353 | 0.3207 |
|              | Cluster_8                                              | Blautia                          | -         | 0.0007     | 0.0037    | -0.0223 | 0.0000     | -0.5962 | 0.0910 | -6.5490 | 0.0000     | -0.8292 | 0.1458 |
|              | Cluster_299                                            | Erysipelotrichaceae UCG-003      | -         | 0.0007     | 0.0357    | -0.1341 | 0.0000     | -0.6334 | 0.1013 | -6.2540 | 0.0483     | -1.4243 | 0.3477 |
|              | Cluster_71                                             | Ruminococcaceae (unknown genus)  | +         | 0.0053     | 0.0058    | 0.0317  | 0.0170     | 0.3611  | 0.1111 | 3.2493  | 0.0475     | 0.5671  | 0.1576 |
|              | Cluster_6                                              | Bifidobacterium                  | -         | 0.0148     | 0.0400    | -0.1344 | 0.0059     | -0.6624 | 0.1794 | -3.6931 | 0.0135     | -0.9844 | 0.2483 |
|              | Household siblings (At least 1 vs none)                |                                  |           |            |           |         |            |         |        |         |            |         |        |
|              | Cluster_108                                            | Dorea                            | +         | 0.0005     | 0.0019    | 0.0079  | 0.0001     | 0.5441  | 0.1195 | 4.5521  | 0.0082     | 1.0875  | 0.2569 |
|              | Cluster_170                                            | Flavonifractor                   | -         | 0.0005     | 0.0009    | -0.0043 | 0.0000     | -0.6606 | 0.0965 | -6.8477 | 0.0000     | -1.1689 | 0.1882 |
|              | Cluster_190                                            | Oscillospiraceae UCG-003         | +         | 0.0005     | 0.0008    | 0.0076  | 0.0000     | 0.6487  | 0.1199 | 5.4091  | 0.0159     | 1.3621  | 0.3127 |
|              | Cluster_58                                             | Coprococcus                      | +         | 0.0005     | 0.0075    | 0.0349  | 0.0001     | 0.7745  | 0.1761 | 4.3970  | 0.0245     | 1.3449  | 0.3436 |
|              | Cluster_62                                             | Odoribacter                      | +         | 0.0005     | 0.0048    | 0.0169  | 0.0002     | 0.6152  | 0.1446 | 4.2535  | 0.0169     | 1.1253  | 0.2841 |
|              | Cluster_68                                             | Christensenellaceae R-7 group    | +         | 0.0005     | 0.0074    | 0.0711  | 0.0000     | 0.9164  | 0.1496 | 6.1244  | 0.0001     | 1.4919  | 0.2781 |
|              | Cluster_69                                             | Lachnospiraceae ND3007 group     | +         | 0.0005     | 0.0028    | 0.0182  | 0.0000     | 1.0226  | 0.1579 | 6.4762  | 0.0000     | 1.9715  | 0.3498 |
|              | Cluster_79                                             | Barnesiella                      | +         | 0.0005     | 0.0072    | 0.0362  | 0.0002     | 0.8071  | 0.1901 | 4.2461  | 0.0369     | 1.4501  | 0.3843 |
|              | Cluster_82                                             | Oscillospiraceae UCG-002         | +         | 0.0005     | 0.0069    | 0.0476  | 0.0000     | 0.9410  | 0.1485 | 6.3350  | 0.0000     | 1.6395  | 0.2896 |
|              | Cluster_240                                            | Eisenbergiella                   | -         | 0.0015     | 0.0008    | -0.0040 | 0.0000     | -0.6692 | 0.1187 | -5.6390 | 0.0002     | -1.3905 | 0.2629 |
|              | Cluster_1                                              | Bacteroides                      | -         | 0.0027     | 0.2980    | -0.4491 | 0.0001     | -0.3169 | 0.0687 | -4.6133 | 0.0001     | -0.5553 | 0.1086 |
|              | Cluster_389                                            | Eggerthella                      | -         | 0.0039     | 0.0002    | -0.0011 | 0.0000     | -0.5411 | 0.0969 | -5.5853 | 0.0023     | -1.2337 | 0.2582 |
|              | Cluster_403                                            | [Ruminococcus] gnavus group      | -         | 0.0046     | 0.0007    | -0.0003 | 0.0000     | -0.7190 | 0.1279 | -5.6224 | 0.0001     | -1.5348 | 0.2913 |
|              | Cluster_8                                              | Blautia                          | -         | 0.0092     | 0.0358    | -0.0860 | 0.0001     | -0.3216 | 0.0728 | -4.4162 | 0.0002     | -0.5626 | 0.1148 |
|              | Cluster_109                                            | Oscillibacter                    | -         | 0.0115     | 0.0013    | -0.0034 | 0.0000     | -0.4196 | 0.0846 | -4.9626 | 0.0218     | -0.7134 | 0.1770 |
|              | Cluster_186                                            | Ruminococcaceae UBA1819          | -         | 0.0143     | 0.0005    | -0.0015 | 0.0000     | -0.4016 | 0.0806 | -4.9832 | 0.0057     | -0.8045 | 0.1845 |
|              | Cluster_65                                             | Tyzerella                        | -         | 0.0192     | 0.0043    | -0.0108 | 0.0006     | -0.7320 | 0.1830 | -4.0006 | 0.0449     | -0.5762 | 0.1257 |
|              | Cluster_85                                             | Lachnoclostridium                | -         | 0.0318     | 0.0081    | -0.0084 | 0.0000     | -0.3760 | 0.0763 | -4.9292 | 0.0001     | -0.6443 | 0.1256 |
|              | Mother born in France (no vs yes)                      |                                  |           |            |           |         |            |         |        |         |            |         |        |
|              | Cluster_174                                            | Oscillospiraceae (unknown genus) | -         | 0.0093     | 0.0011    | -0.0036 | 0.0016     | -0.5830 | 0.1346 | -4.3310 | 0.0284     | -0.2904 | 0.1426 |
|              |                                                        | otu.id                           | Family    |            |           |         |            |         |        |         |            |         |        |
| Family level | Gestational age (<37 weeks of GA vs >= 37 weeks of GA) |                                  |           |            |           |         |            |         |        |         |            |         |        |
|              | Cluster_117                                            | Butyricicoccaceae                | -         | 0.0006     | 0.0021    | -0.0086 | 0.0003     | -0.4427 | 0.1062 | -4.1684 | 0.0000     | -1.0260 | 0.1934 |
|              | Cluster_299                                            | Erysipelatoclostridiaceae        | -         | 0.0006     | 0.0004    | -0.0026 | 0.0000     | -0.5645 | 0.1027 | -5.4944 | 0.0001     | -1.6502 | 0.2912 |
|              | Cluster_82                                             | Oscillospiraceae                 | +         | 0.0025     | 0.0151    | 0.0454  | 0.0000     | 0.4425  | 0.0632 | 7.0015  | 0.0178     | 0.3947  | 0.1077 |
|              | Cluster_6                                              | Bifidobacteriaceae               | -         | 0.0082     | 0.0400    | -0.1343 | 0.0350     | -0.4868 | 0.1771 | -2.7486 | 0.0027     | -1.0159 | 0.2449 |
|              | Household siblings (At least 1 vs none)                |                                  |           |            |           |         |            |         |        |         |            |         |        |
|              | Cluster_62                                             | Marinifilaceae                   | +         | 0.0004     | 0.0054    | 0.0188  | 0.0396     | 0.3352  | 0.1318 | 2.5443  | 0.0235     | 0.9008  | 0.2537 |
|              | Cluster_68                                             | Christensenellaceae              | +         | 0.0004     | 0.0075    | 0.0710  | 0.0000     | 0.7037  | 0.1483 | 4.7464  | 0.0001     | 1.4045  | 0.2785 |
|              | Cluster_79                                             | Barnesiellaceae                  | +         | 0.0004     | 0.0081    | 0.0364  | 0.0084     | 0.5600  | 0.1802 | 3.1083  | 0.0220     | 1.2976  | 0.3600 |
|              | Cluster_1                                              | Bacteroidaceae                   | -         | 0.0025     | 0.2980    | -0.4494 | 0.0000     | -0.4985 | 0.0702 | -7.1050 | 0.0000     | -0.5693 | 0.1091 |
|              | Cluster_25                                             | Veillonellaceae                  | -         | 0.0324     | 0.0081    | -0.0190 | 0.0000     | -0.9436 | 0.2070 | -4.5573 | 0.0355     | -1.4105 | 0.4026 |
|              | Cluster_389                                            | Eggerthellaceae                  | -         | 0.0457     | 0.0004    | -0.0007 | 0.0000     | -0.5609 | 0.0811 | -6.9158 | 0.0050     | -0.8047 | 0.1886 |
|              | Cluster_6                                              | Bifidobacteriaceae               | -         | 0.0457     | 0.0398    | -0.1214 | 0.0000     | -0.5517 | 0.1225 | -4.5047 | 0.0262     | -0.6623 | 0.1925 |

LDM: mean.freq= the mean relative abundance of taxa in the tested category, beta= effect size. ANCOM-BC: beta= coefficient obtained from the ANCOM-BC log linear (natural log) model (log-transformed change in abundance), se = standard error of the beta, W = test statistic (beta/se). ALDEx2: beta= per-feature effect size, se= standard error of the beta. Direction: - = less abundant taxa in the category compared to the reference, + = more abundant taxa in the category compared to the reference. adj.pvalue = False discovery rate (FDR) adjusted p-value.

**Table S3. Multivariate association between children enterotypes and early life factors in ELFE children**

|                                                    | N   | Enterotype P_type vs B_type |            |              |
|----------------------------------------------------|-----|-----------------------------|------------|--------------|
|                                                    |     | OR <sup>a</sup>             | 95% CI     | p-value      |
| <b>Gestational age (weeks)</b>                     | 588 | 1.00                        | 0.86, 1.18 | 0.95         |
| <b>Delivery mode</b>                               | 578 |                             |            | 0.45         |
| Vaginal                                            |     | —                           | —          |              |
| Cesarean                                           |     | 0.80                        | 0.43, 1.41 |              |
| <b>Early neonatal antibiotics</b>                  | 557 |                             |            | 0.89         |
| No                                                 |     | —                           | —          |              |
| Yes                                                |     | 0.89                        | 0.12, 3.99 |              |
| <b>Human milk consumption</b>                      | 537 |                             |            | <b>0.033</b> |
| No                                                 |     | —                           | —          |              |
| Yes                                                |     | 1.87                        | 1.05, 3.50 |              |
| <b>Duration of human milk consumption (months)</b> | 537 | 1.01                        | 0.96, 1.05 | 0.72         |
| <b>Skin-to-skin practice</b>                       |     |                             |            | 0.63         |
| Yes                                                |     | —                           | —          |              |
| No                                                 |     | 1.23                        | 0.50, 2.71 |              |
| <b>Maternal prepregnancy BMI</b>                   | 617 |                             |            | 0.63         |
| Underweight                                        |     | 1.09                        | 0.48, 2.27 |              |
| Normal                                             |     | —                           | —          |              |
| Overweight                                         |     | 1.01                        | 0.57, 1.72 |              |
| Obese                                              |     | 1.62                        | 0.77, 3.19 |              |
| <b>Daycare exposure</b>                            | 598 |                             |            | <b>0.011</b> |
| Family                                             |     | —                           | —          |              |
| Childcare assistant/Paid home help                 |     | 0.54                        | 0.33, 0.90 |              |
| Daycare centre                                     |     | 1.14                        | 0.58, 2.19 |              |
| <b>Household siblings</b>                          | 604 |                             |            | 0.062        |
| No                                                 |     | —                           | —          |              |
| At least 1                                         |     | 1.53                        | 0.98, 2.42 |              |
| <b>Mother born in France</b>                       | 625 |                             |            | 0.66         |
| Yes                                                |     | —                           | —          |              |
| No                                                 |     | 0.83                        | 0.33, 1.80 |              |

Logistic regression models.

Abbreviations: N = number of children included in each model; P\_type, enterotype enriched in *Prevotella*; B\_type, enterotype enriched in *Bacteroides*; CI, Confidence Interval; BMI, Body Mass Index

<sup>a</sup> Each covariate is adjusted for its own set of parsimonious confounding factors presented in the “Exposures of interest” section.

\*Chosen cut points are median scores within the population

p-values marked with bold indicate statistically significant p-values ( $p \leq 0.05$ )

**Table S4. Multivariate association between alpha diversity metrics and early life factors in ELFE children**

|                                                    | Chao1 estimate |                   |            |                  | Shannon index     |              |                  |
|----------------------------------------------------|----------------|-------------------|------------|------------------|-------------------|--------------|------------------|
|                                                    | N              | Beta <sup>a</sup> | 95% CI     | p-value          | Beta <sup>a</sup> | 95% CI       | p-value          |
| <b>Gestational age (weeks)</b>                     | 588            | 3.2               | -1.5, 8.0  | 0.18             | 0.01              | -0.02, 0.03  | 0.62             |
| <b>Delivery mode</b>                               | 578            |                   |            | <b>0.050</b>     |                   |              | <b>0.007</b>     |
| Vaginal                                            |                | —                 | —          |                  | —                 | —            |                  |
| Cesarean                                           |                | -17               | -34, 0.00  |                  | 0.12              | -0.20, -0.03 |                  |
| <b>Early neonatal antibiotics</b>                  | 557            |                   |            | 0.56             |                   |              | 0.21             |
| No                                                 |                | —                 | —          |                  | —                 | —            |                  |
| Yes                                                |                | 15                | -36, 66    |                  | 0.16              | -0.09, 0.41  |                  |
| <b>Human milk consumption</b>                      | 537            |                   |            | 0.70             |                   |              | 0.61             |
| No                                                 |                | —                 | —          |                  | —                 | —            |                  |
| Yes                                                |                | 3.1               | -12, 19    |                  | 0.02              | -0.10, 0.06  |                  |
| <b>Duration of human milk consumption (months)</b> | 537            | 0.67              | -0.57, 1.9 | 0.29             | 0.01              | 0.00, 0.01   | 0.055            |
| <b>Skin-to-skin practice</b>                       | 557            |                   |            | 0.80             |                   |              | 0.83             |
| Yes                                                |                | —                 | —          |                  | —                 | —            |                  |
| No                                                 |                | -3.4              | -30, 23    |                  | 0.01              | -0.15, 0.12  |                  |
| <b>Maternal prepregnancy BMI</b>                   | 617            |                   |            | 0.077            |                   |              | 0.091            |
| Underweight                                        |                | 5.9               | -18, 30    |                  | 0.08              | -0.03, 0.20  |                  |
| Normal                                             |                | —                 | —          |                  | —                 | —            |                  |
| Overweight                                         |                | 18                | 2.0, 35    |                  | 0.09              | 0.01, 0.17   |                  |
| Obese                                              |                | 21                | -2.9, 45   |                  | 0.06              | -0.06, 0.18  |                  |
| <b>Daycare exposure</b>                            | 598            |                   |            | 0.25             |                   |              | 0.53             |
| Family                                             |                | —                 | —          |                  | —                 | —            |                  |
| Childcare assistant/Paid home help                 |                | -12               | -28, 2.9   |                  | 0.04              | -0.11, 0.04  |                  |
| Daycare centre                                     |                | -14               | -35, 7.7   |                  | 0.05              | -0.16, 0.05  |                  |
| <b>Household siblings</b>                          | 604            |                   |            | <b>&lt;0.001</b> |                   |              | <b>&lt;0.001</b> |
| No                                                 |                | —                 | —          |                  | —                 | —            |                  |
| At least 1                                         |                | 42                | 29, 54     |                  | 0.18              | 0.11, 0.24   |                  |
| <b>Mother born in France</b>                       | 625            |                   |            | 0.16             |                   |              | 0.20             |
| Yes                                                |                | —                 | —          |                  | —                 | —            |                  |
| No                                                 |                | -17               | -41, 6.9   |                  | 0.08              | -0.20, 0.04  |                  |

Linear regression models.

Abbreviations: N = number of children included in each model; CI, Confidence Interval; BMI, Body Mass Index

<sup>a</sup> Each covariate is adjusted for its own set of parsimonious confounding factors presented in the “Exposures of interest” section.

\*Chosen cut points are median scores within the population

p-values marked with bold indicate statistically significant p-values ( $p \leq 0.05$ )

**Table S5. Association between beta diversity metrics and early life factors in ELFE children**

| Exposures                  | Bray Curtis |              | UniFrac |              |
|----------------------------|-------------|--------------|---------|--------------|
|                            | R           | P-value      | R       | P-value      |
| Gestational age (weeks)    | 0.002       | 0.643        | 0.002   | 0.603        |
| Delivery mode              | 0.002       | 0.117        | 0.002   | 0.156        |
| Early neonatal antibiotics | 0.001       | 0.809        | 0.001   | 0.798        |
| Human milk consumption     | 0.002       | 0.627        | 0.002   | 0.627        |
| Skin-to-skin practice      | 0.001       | 0.947        | 0.001   | 0.962        |
| Maternal prepregnancy BMI  | 0.006       | 0.208        | 0.006   | 0.168        |
| Daycare exposure           | 0.004       | 0.612        | 0.004   | 0.608        |
| Household siblings         | 0.008       | <b>0.005</b> | 0.008   | <b>0.005</b> |
| Mother born in France      | 0.001       | 0.541        | 0.001   | 0.550        |

Each covariate is adjusted for its own set of parsimonious confounding factors presented in the “Exposures of interest” section. FDR  $p$  adjusted  $\leq 0.05$  are marked in bold.

**Table S6. Differential abundance testing results for factors significantly associated the gut microbiota composition according to three different methods in ELFE children**

| otu.id                                  | Genus                         | Direction | LDM        |           |         | ANCOM-BC   |         |        |         | ALDEx2     |         |        |
|-----------------------------------------|-------------------------------|-----------|------------|-----------|---------|------------|---------|--------|---------|------------|---------|--------|
|                                         |                               |           | adj,pvalue | mean,freq | beta    | adj,pvalue | beta    | se     | W       | adj,pvalue | beta    | se     |
| Household siblings (At least 1 vs none) |                               |           |            |           |         |            |         |        |         |            |         |        |
| Cluster_170                             | Flavonifractor                | -         | 0,0004     | 0,0008    | -0,0043 | 0,0000     | -0,6606 | 0,0965 | -6,8477 | 0,0000     | -1,1187 | 0,2087 |
| Cluster_190                             | Oscillospiraceae UCG-003      | +         | 0,0004     | 0,0007    | 0,0076  | 0,0000     | 0,6487  | 0,1199 | 5,4091  | 0,0050     | 1,5918  | 0,3455 |
| Cluster_240                             | Eisenbergiella                | -         | 0,0004     | 0,0007    | -0,0040 | 0,0000     | -0,6692 | 0,1187 | -5,6390 | 0,0002     | -1,5268 | 0,2868 |
| Cluster_38                              | Subdoligranulum               | +         | 0,0004     | 0,0147    | -0,0220 | 0,0000     | 0,8376  | 0,1710 | 4,8978  | 0,0001     | 1,6205  | 0,3192 |
| Cluster_389                             | Eggerthella                   | -         | 0,0004     | 0,0002    | -0,1213 | 0,0000     | -0,5411 | 0,0969 | -5,5853 | 0,0002     | -1,4653 | 0,2833 |
| Cluster_58                              | Coprococcus                   | +         | 0,0004     | 0,0081    | 0,0349  | 0,0002     | 0,7745  | 0,1761 | 4,3970  | 0,0200     | 1,4785  | 0,3805 |
| Cluster_62                              | Odoribacter                   | +         | 0,0004     | 0,0048    | 0,0169  | 0,0000     | -0,3760 | 0,0763 | -4,9292 | 0,0041     | 1,3302  | 0,3108 |
| Cluster_68                              | Christensenellaceae R-7 group | +         | 0,0004     | 0,0071    | 0,0148  | 0,0000     | 0,9164  | 0,1496 | 6,1244  | 0,0001     | 1,5802  | 0,3091 |
| Cluster_69                              | Lachnospiraceae ND3007 group  | +         | 0,0004     | 0,0030    | 0,0182  | 0,0000     | 1,0226  | 0,1579 | 6,4762  | 0,0010     | 1,8642  | 0,3913 |
| Cluster_82                              | Oscillospiraceae UCG-002      | +         | 0,0004     | 0,0065    | 0,0476  | 0,0000     | 0,9410  | 0,1485 | 6,3350  | 0,0000     | 1,7488  | 0,3209 |
| Cluster_1                               | Bacteroides                   | -         | 0,0105     | 0,2910    | -0,4491 | 0,0005     | -0,3169 | 0,0687 | -4,6133 | 0,0005     | -0,5559 | 0,1193 |
| Cluster_85                              | Lachnoclostridium             | -         | 0,0189     | 0,0079    | -0,0084 | 0,0000     | -0,3760 | 0,0763 | -4,9292 | 0,0001     | -0,6981 | 0,1398 |
| Cluster_186                             | Ruminococcaceae UBA1819       | -         | 0,0226     | 0,0004    | -0,0001 | 0,0000     | -0,4016 | 0,0806 | -4,9832 | 0,0257     | -0,8218 | 0,2030 |
| Cluster_403                             | [Ruminococcus] gnavus group   | +         | 0,0226     | 0,0007    | -0,0003 | 0,0000     | -0,7190 | 0,1279 | -5,6224 | 0,0021     | -1,5175 | 0,3276 |
| Cluster_8                               | Blautia                       | -         | 0,0226     | 0,0390    | -0,0860 | 0,0005     | -0,3169 | 0,0687 | -4,6133 | 0,0012     | -0,5508 | 0,1234 |
| Household siblings (At least 1 vs none) |                               |           |            |           |         |            |         |        |         |            |         |        |
| otu.id                                  | Family                        |           |            |           |         |            |         |        |         |            |         |        |
| Cluster_62                              | Marinifilaceae                | +         | 0,0006     | 0,0053    | 0,0019  | 0,0122     | 0,4342  | 0,1431 | 3,0344  | 0,0066     | 1,0668  | 0,2717 |
| Cluster_68                              | Christensenellaceae           | +         | 0,0006     | 0,0072    | 0,0079  | 0,0000     | 0,7615  | 0,1662 | 4,5813  | 0,0002     | 1,5174  | 0,3087 |
| Cluster_1                               | Bacteroidaceae                | -         | 0,0107     | 0,2910    | -0,0160 | 0,0000     | -0,4831 | 0,0781 | -6,1844 | 0,0002     | -0,5707 | 0,1213 |
| Cluster_389                             | Eggerthellaceae               | -         | 0,0107     | 0,0004    | 0,0349  | 0,0000     | -0,6280 | 0,0884 | -7,1076 | 0,0010     | -0,9263 | 0,1983 |
| Cluster_67                              | Enterobacteriaceae            | -         | 0,0169     | 0,0027    | 0,0014  | 0,0000     | -0,7444 | 0,1559 | -4,7749 | 0,0067     | -1,1937 | 0,3040 |
| Cluster_6                               | Bifidobacteriaceae            | -         | 0,0348     | 0,0415    | 0,0050  | 0,0000     | -0,5820 | 0,1282 | -4,5397 | 0,0150     | -0,7145 | 0,1988 |

LDM: mean.freq= the mean relative abundance of taxa in the tested category, beta= effect size. ANCOM-BC: beta= coefficient obtained from the ANCOM-BC log linear (natural log) model (log-transformed change in abundance), se = standard error of the beta, W = test statistic (beta/se). ALDEx2: beta= per-feature effect size, se= standard error of the beta. Direction: - = less abundant taxa in the category compared to the reference, + = more abundant taxa in the category compared to the reference. adj.pvalue = False discovery rate (DFR) adjusted p-value.

**Table S7. Multivariate association between pooled sample enterotypes and early life factors with imputed dataset**

|                                                    | N   | OR <sup>a</sup> | Enterotype P_type vs B_type<br>95% CI | p-value      |
|----------------------------------------------------|-----|-----------------|---------------------------------------|--------------|
| <b>Pooled sample</b>                               |     |                 |                                       |              |
| <b>Gestational age (weeks)</b>                     | 798 | 1.02            | 0.98, 1.07                            | 0.30         |
| <b>Delivery mode</b>                               | 798 |                 |                                       | 0.47         |
| Vaginal                                            |     | —               | —                                     |              |
| Cesarean                                           |     | 0.85            | 0.53, 1.33                            |              |
| <b>Early neonatal antibiotics</b>                  | 798 |                 |                                       | 0.55         |
| No                                                 |     | —               | —                                     |              |
| Yes                                                |     | 0.80            | 0.37, 1.67                            |              |
| <b>Human milk consumption</b>                      | 798 |                 |                                       | <b>0.010</b> |
| No                                                 |     | —               | —                                     |              |
| Yes                                                |     | 2.01            | 1.17, 3.63                            |              |
| <b>Duration of human milk consumption (months)</b> | 798 | 1.01            | 0.97, 1.05                            | 0.56         |
| <b>Skin-to-skin practice</b>                       | 798 |                 |                                       | 0.32         |
| Yes                                                |     | —               | —                                     |              |
| No                                                 |     | 0.73            | 0.38, 1.35                            |              |
| <b>Maternal prepregnancy BMI</b>                   | 798 |                 |                                       | 0.28         |
| Underweight                                        |     | 0.88            | 0.39, 1.77                            |              |
| Normal                                             |     | —               | —                                     |              |
| Overweight                                         |     | 1.16            | 0.72, 1.84                            |              |
| Obese                                              |     | 1.80            | 0.96, 3.23                            |              |
| <b>Daycare exposure</b>                            | 798 |                 |                                       | <b>0.001</b> |
| Family                                             |     | —               | —                                     |              |
| Childcare assistant/Paid home help                 |     | 0.78            | 0.50, 1.22                            |              |
| Daycare centre                                     |     | 2.11            | 1.21, 3.66                            |              |
| <b>Household siblings</b>                          | 798 |                 |                                       | 0.082        |
| No                                                 |     | —               | —                                     |              |
| At least 1                                         |     | 1.41            | 0.96, 2.09                            |              |
| <b>Mother born in France</b>                       | 798 |                 |                                       | 0.46         |
| Yes                                                |     | —               | —                                     |              |
| No                                                 |     | 1.26            | 0.67, 2.25                            |              |
| <b>ELFE</b>                                        |     |                 |                                       |              |
| <b>Age at complementary feeding</b>                | 626 |                 |                                       | 0.58         |
| ≤ 6 months                                         |     | —               | —                                     |              |
| >6 months                                          |     | 0.03            | -0.07, 0.13                           |              |
| <b>Age at first vegetables introduction</b>        | 626 |                 |                                       | 0.56         |
| ≤6 months                                          |     | —               | —                                     |              |
| >6 months                                          |     | 0.85            | 0.48, 1.45                            |              |
| <b>Age at first fruits introduction</b>            | 626 |                 |                                       | 0.40         |
| ≤ 6 months                                         |     | —               | —                                     |              |
| >6 months                                          |     | 0.80            | 0.48, 1.32                            |              |
| <b>Age at first meat introduction</b>              | 626 |                 |                                       | 0.39         |
| ≤ 6 months                                         |     | —               | —                                     |              |
| >6 months                                          |     | 0.79            | 0.47, 1.38                            |              |
| <b>Age at first fish introduction</b>              | 626 |                 |                                       | 0.20         |
| ≤ 6 months                                         |     | —               | —                                     |              |
| >6 months                                          |     | 0.68            | 0.38, 1.25                            |              |
| <b>PNNS score*</b>                                 | 626 |                 |                                       | 0.065        |
| ≤ 7.80                                             |     | —               | —                                     |              |
| > 7.80                                             |     | 1.49            | 0.98, 2.29                            |              |
| <b>Pregnancy score*</b>                            | 626 |                 |                                       | 0.25         |
| ≤ 7.75                                             |     | —               | —                                     |              |
| > 7.75                                             |     | 1.29            | 0.84, 2.01                            |              |

|                                      |     |      |            |       |
|--------------------------------------|-----|------|------------|-------|
| <b>Antibiotics in the first year</b> | 626 |      |            | 0.18  |
| Yes                                  |     | —    | —          |       |
| No                                   |     | 0.74 | 0.47, 1.15 |       |
| <b>Environnement</b>                 | 626 |      |            | 0.55  |
| Rural                                |     | —    | —          |       |
| Urban                                |     | 1.15 | 0.73, 1.86 |       |
| <b>EPIPAGE 2</b>                     |     |      |            |       |
| <b>Antibiotics during delivery</b>   | 172 |      |            | 0.071 |
| No                                   |     | —    | —          |       |
| Yes                                  |     | 0.41 | 0.15, 1.08 |       |
| <b>Antibiotics during pregnancy</b>  | 172 |      |            | 0.55  |
| No                                   |     | —    | —          |       |
| Yes                                  |     | 1.31 | 0.54, 3.11 |       |

Logistic regression models.

Abbreviations: N = number of children included in each model; P\_type, enterotype enriched in *Prevotella*; B\_type, enterotype enriched in *Bacteroides*; CI, Confidence Interval; BMI, Body Mass Index; PNSS, Programme National Nutrition Santé.

<sup>a</sup> Each covariate is adjusted for its own set of parsimonious confounding factors presented in the “Exposures of interest” section.

\*Chosen cut points are median scores within the population

p-values marked with bold indicate statistically significant p-values ( $p \leq 0.05$ )

**Table S8. Multivariate association between alpha diversity metrics and early life factors with imputed dataset in pooled sample.**

| Pooled sample                                      | N   | Chao1 estimate    |            |                  | Shannon index     |              |                  |
|----------------------------------------------------|-----|-------------------|------------|------------------|-------------------|--------------|------------------|
|                                                    |     | Beta <sup>a</sup> | 95% CI     | p-value          | Beta <sup>a</sup> | 95% CI       | p-value          |
| <b>Gestational age (weeks)</b>                     | 798 | 2.1               | 0.82, 3.4  | <b>0.001</b>     | 0.01              | 0.00, 0.02   | <b>0.006</b>     |
| <b>Delivery mode</b>                               | 798 |                   |            | <b>0.004</b>     |                   |              | <b>&lt;0.001</b> |
| Vaginal                                            |     | —                 | —          |                  | —                 | —            |                  |
| Cesarean                                           |     | -21               | -34, -6.6  |                  | -0.11             | -0.18, -0.05 |                  |
| <b>Early neonatal antibiotics</b>                  | 798 |                   |            | 0.23             |                   |              | 0.052            |
| No                                                 |     | —                 | —          |                  | —                 | —            |                  |
| Yes                                                |     | 14                | -9.1, 38   |                  | 0.11              | 0.00, 0.23   |                  |
| <b>Human milk consumption</b>                      | 798 |                   |            | 0.28             |                   |              | 0.94             |
| No                                                 |     | —                 | —          |                  | —                 | —            |                  |
| Yes                                                |     | 8.0               | -6.6, 23   |                  | 0.00              | -0.07, 0.07  |                  |
| <b>Duration of human milk consumption (months)</b> | 798 | 1.0               | -0.18, 2.1 | 0.10             | 0.01              | 0.00, 0.01   | <b>0.024</b>     |
| <b>Skin-to-skin practice</b>                       | 798 |                   |            | 0.63             |                   |              | 0.19             |
| Yes                                                |     | —                 | —          |                  | —                 | —            |                  |
| No                                                 |     | 4.7               | -14, 24    |                  | 0.06              | -0.03, 0.15  |                  |
| <b>Maternal prepregnancy BMI</b>                   | 798 |                   |            | <b>0.016</b>     |                   |              | <b>0.029</b>     |
| Underweight                                        |     | -1.0              | -23, 21    |                  | 0.05              | -0.06, 0.16  |                  |
| Normal                                             |     | —                 | —          |                  | —                 | —            |                  |
| Overweight                                         |     | 21                | 5.6, 36    |                  | 0.10              | 0.03, 0.18   |                  |
| Obese                                              |     | 22                | 0.70, 44   |                  | 0.08              | -0.02, 0.19  |                  |
| <b>Daycare exposure</b>                            | 798 |                   |            | 0.96             |                   |              | 0.74             |
| Family                                             |     | —                 | —          |                  | —                 | —            |                  |
| Childcare assistant/Paid home help                 |     | 1.6               | -12, 15    |                  | 0.02              | -0.04, 0.09  |                  |
| Daycare centre                                     |     | 0.01              | -19, 19    |                  | 0.01              | -0.09, 0.10  |                  |
| <b>Household siblings</b>                          | 798 |                   |            | <b>&lt;0.001</b> |                   |              | <b>&lt;0.001</b> |
| No                                                 |     | —                 | —          |                  | —                 | —            |                  |
| At least 1                                         |     | 39                | 27, 50     |                  | 0.17              | 0.12, 0.23   |                  |
| <b>Mother born in France</b>                       | 798 |                   |            | 0.24             |                   |              | 0.057            |



|                                                   |       |          |      |       |             |      |
|---------------------------------------------------|-------|----------|------|-------|-------------|------|
| Yes                                               | —     | —        |      | —     | —           |      |
| No                                                | -12   | -32, 8.2 |      | -0.10 | -0.19, 0.00 |      |
| <b>ELFE</b>                                       |       |          |      |       |             |      |
| <b>Age at complementary feeding</b>               | 626   |          | 0.89 |       |             | 0.58 |
| ≤ 6 months                                        | —     | —        |      | —     | —           |      |
| >6 months                                         | 1.5   | -19, 22  |      | 0.03  | -0.07, 0.13 |      |
| <b>Age at first vegetables introduction</b>       | 626   |          | 0.77 |       |             | 0.39 |
| ≤6 months                                         | —     | —        |      | —     | —           |      |
| >6 months                                         | 2.4   | -13, 18  |      | 0.04  | -0.04, 0.11 |      |
| <b>Age at first fruits introduction</b>           | 626   |          | 0.88 |       |             | 0.93 |
| ≤ 6 months                                        | —     | —        |      | —     | —           |      |
| >6 months                                         | 1.1   | -13, 15  |      | 0.00  | -0.07, 0.07 |      |
| <b>Age at first meat introduction</b>             | 626   |          | 0.95 |       |             | 0.59 |
| ≤ 6 months                                        | —     | —        |      | —     | —           |      |
| >6 months                                         | -0.47 | -16, 16  |      | 0.02  | -0.06, 0.10 |      |
| <b>Age at first fish introduction</b>             | 626   |          | 0.99 |       |             | 0.88 |
| ≤ 6 months                                        | —     | —        |      | —     | —           |      |
| >6 months                                         | 0.13  | -18, 18  |      | -0.01 | -0.10, 0.08 |      |
| <b>Maternal pregnancy diet (PNNS score)*</b>      | 626   |          | 0.48 |       |             | 0.67 |
| ≤ 7.80                                            | —     | —        |      | —     | —           |      |
| > 7.80                                            | 4.4   | -7.8, 17 |      | 0.01  | -0.05, 0.07 |      |
| <b>Maternal pregnancy diet (Pregnancy score)*</b> | 626   |          | 0.79 |       |             | 0.80 |
| ≤ 7.75                                            | —     | —        |      | —     | —           |      |
| > 7.75                                            | 1.7   | -11, 14  |      | 0.01  | -0.05, 0.07 |      |
| <b>Antibiotics in the first year</b>              | 626   |          | 0.36 |       |             | 0.11 |
| Yes                                               | —     | —        |      | —     | —           |      |
| No                                                | 5.9   | -6.7, 18 |      | 0.05  | -0.01, 0.11 |      |
| <b>Environnement</b>                              | 626   |          | 0.62 |       |             | 0.81 |
| Rural                                             | —     | —        |      | —     | —           |      |
| Urban                                             | -3.5  | -17, 10  |      | -0.01 | -0.08, 0.06 |      |
| <b>EPIPAGE 2</b>                                  |       |          |      |       |             |      |
| <b>Antibiotics during delivery</b>                | 172   |          | 0.24 |       |             | 0.51 |
| No                                                | —     | —        |      | —     | —           |      |
| Yes                                               | 20    | -13, 52  |      | 0.05  | -0.10, 0.20 |      |
| <b>Antibiotics during pregnancy</b>               | 172   |          | 0.79 |       |             | 0.26 |
| No                                                | —     | —        |      | —     | —           |      |
| Yes                                               | 4.2   | -27, 36  |      | 0.08  | -0.06, 0.23 |      |

Linear regression models.

Abbreviations: N = number of children included in each model; CI, Confidence Interval; BMI, Body Mass Index; PNSS, Programme National Nutrition Santé.

<sup>a</sup> Each covariate is adjusted for its own set of parsimonious confounding factors presented in the “Exposures of interest” section.

\*Chosen cut points are median scores within the population

p-values marked with bold indicate statistically significant p-values ( $p \leq 0.05$ )

**Table S9. PERMANOVA association between beta diversity metrics and early life factors in pooled sample with imputed dataset**

| Group         | Exposures                                 | Bray-Curtis |              | Unifrac |              |
|---------------|-------------------------------------------|-------------|--------------|---------|--------------|
|               |                                           | R           | P-value      | R       | P-value      |
| Pooled sample | Gestational age                           | 0.006       | <b>0.005</b> | 0.007   | <b>0.005</b> |
| Pooled sample | Delivery mode                             | 0.002       | 0.074        | 0.002   | <b>0.018</b> |
| Pooled sample | Early neonatal antibiotics                | 0.001       | 0.525        | 0.002   | 0.181        |
| Pooled sample | Human milk consumption                    | 0.001       | 0.450        | 0.002   | 0.161        |
| Pooled sample | Skin-to-skin practice                     | 0.001       | 0.955        | 0.001   | 0.946        |
| Pooled sample | Maternal prepregnancy BMI                 | 0.005       | 0.107        | 0.005   | <b>0.023</b> |
| Pooled sample | Daycare exposure                          | 0.004       | 0.066        | 0.003   | 0.296        |
| Pooled sample | Household siblings                        | 0.007       | <b>0.005</b> | 0.012   | <b>0.005</b> |
| Pooled sample | Mother born in France                     | 0.002       | 0.115        | 0.003   | <b>0.002</b> |
| ELFE          | Complementary feeding                     | 0.001       | 0.757        | 0.002   | 0.416        |
| ELFE          | Vegetables introduction                   | 0.002       | 0.354        | 0.003   | 0.126        |
| ELFE          | Fruits introduction                       | 0.003       | <b>0.023</b> | 0.002   | 0.248        |
| ELFE          | Meat introduction                         | 0.002       | 0.410        | 0.002   | 0.425        |
| ELFE          | Fish introduction                         | 0.002       | 0.427        | 0.002   | 0.255        |
| ELFE          | Maternal pregnancy diet (PNSS score)      | 0.001       | 0.740        | 0.002   | 0.242        |
| ELFE          | Maternal pregnancy diet (Pregnancy score) | 0.001       | 0.919        | 0.001   | 0.978        |
| ELFE          | Environment                               | 0.001       | 0.789        | 0.001   | 0.635        |
| ELFE          | Antibiotics during first year of life     | 0.002       | 0.645        | 0.001   | 0.648        |
| EPIPAGE 2     | Antibiotics during pregnancy              | 0.004       | 0.882        | 0.005   | 0.672        |
| EPIPAGE 2     | Antibiotics during delivery               | 0.006       | 0.814        | 0.006   | 0.672        |

Each covariate is adjusted for its own set of parsimonious confounding factors presented in the “Exposures of interest” section. FDR p adjusted  $\leq 0.05$  are marked in bold.

Abbreviations: BMI, Body Mass Index; PNSS, Programme National Nutrition Santé.

**Table S10. Differential abundance testing results for factors significantly associated the gut microbiota composition according to three different methods in pooled sample.**

|              |                                                        |                                  | LDM       |            |           |        | ANCOM-BC   |        |       |        | ALDEx2     |        |       |
|--------------|--------------------------------------------------------|----------------------------------|-----------|------------|-----------|--------|------------|--------|-------|--------|------------|--------|-------|
|              | otu.id                                                 | Genus                            | Direction | adj.pvalue | mean.freq | beta   | adj.pvalue | beta   | se    | W      | adj.pvalue | beta   | se    |
| Genus level  | Gestational age (<37 weeks of GA vs >= 37 weeks of GA) |                                  |           |            |           |        |            |        |       |        |            |        |       |
|              | Cluster_117                                            | Butyrivicoccus                   | -         | 0.001      | 0.002     | -0.010 | 0.000      | -0.640 | 0.096 | -6.658 | 0.000      | -0.958 | 0.171 |
|              | Cluster_299                                            | Erysipelotrichaceae UCG-003      | -         | 0.001      | 0.000     | -0.003 | 0.000      | -0.665 | 0.088 | -7.550 | 0.017      | -1.446 | 0.302 |
|              | Cluster_31                                             | Anaerostipes                     | -         | 0.001      | 0.011     | -0.049 | 0.000      | -0.752 | 0.110 | -6.844 | 0.000      | -1.002 | 0.167 |
|              | Cluster_71                                             | Ruminococcaceae (unknown genus)  | +         | 0.001      | 0.006     | 0.033  | 0.017      | 0.288  | 0.098 | 2.933  | 0.035      | 0.528  | 0.141 |
|              | Cluster_72                                             | [Eubacterium] hallii group       | -         | 0.001      | 0.004     | -0.028 | 0.000      | -0.949 | 0.128 | -7.418 | 0.000      | -1.475 | 0.285 |
|              | Cluster_8                                              | Blautia                          | -         | 0.001      | 0.035     | -0.175 | 0.000      | -0.686 | 0.077 | -8.889 | 0.000      | -0.876 | 0.126 |
|              | Household siblings (At least 1 vs none)                |                                  |           |            |           |        |            |        |       |        |            |        |       |
|              | Cluster_108                                            | Dorea                            | +         | 0.000      | 0.002     | 0.008  | 0.000      | 0.494  | 0.114 | 4.329  | 0.022      | 0.956  | 0.242 |
|              | Cluster_170                                            | Flavonifractor                   | -         | 0.000      | 0.001     | -0.004 | 0.000      | -0.642 | 0.092 | -6.948 | 0.000      | -1.149 | 0.179 |
|              | Cluster_190                                            | Oscillospiraceae UCG-003         | +         | 0.000      | 0.001     | 0.007  | 0.000      | 0.640  | 0.114 | 5.604  | 0.006      | 1.316  | 0.296 |
|              | Cluster_240                                            | Eisenbergiella                   | -         | 0.000      | 0.001     | -0.005 | 0.000      | -0.675 | 0.112 | -6.019 | 0.000      | -1.380 | 0.249 |
|              | Cluster_389                                            | Eggerthella                      | -         | 0.000      | 0.000     | -0.001 | 0.000      | -0.535 | 0.093 | -5.727 | 0.001      | -1.212 | 0.245 |
|              | Cluster_58                                             | Coprococcus                      | +         | 0.000      | 0.007     | 0.039  | 0.000      | 0.782  | 0.168 | 4.653  | 0.015      | 1.330  | 0.326 |
|              | Cluster_62                                             | Odoribacter                      | +         | 0.000      | 0.005     | 0.019  | 0.000      | 0.641  | 0.138 | 4.641  | 0.004      | 1.178  | 0.270 |
|              | Cluster_68                                             | Christensenellaceae R-7 group    | +         | 0.000      | 0.008     | 0.070  | 0.000      | 0.935  | 0.142 | 6.565  | 0.000      | 1.499  | 0.266 |
|              | Cluster_69                                             | Lachnospiraceae ND3007 group     | +         | 0.000      | 0.003     | 0.019  | 0.000      | 0.992  | 0.150 | 6.608  | 0.000      | 1.913  | 0.334 |
|              | Cluster_82                                             | Oscillospiraceae UCG-002         | +         | 0.000      | 0.007     | 0.049  | 0.000      | 0.913  | 0.143 | 6.365  | 0.000      | 1.560  | 0.279 |
|              | Cluster_1                                              | Bacteroides                      | -         | 0.003      | 0.300     | -0.454 | 0.000      | -0.301 | 0.066 | -4.570 | 0.000      | -0.546 | 0.104 |
|              | Cluster_109                                            | Oscillibacter                    | -         | 0.003      | 0.001     | -0.004 | 0.000      | -0.409 | 0.081 | -5.051 | 0.014      | -0.695 | 0.170 |
|              | Cluster_403                                            | [Ruminococcus] gnavus group      | -         | 0.004      | 0.001     | 0.000  | 0.000      | -0.676 | 0.124 | -5.433 | 0.000      | -1.440 | 0.279 |
|              | Cluster_8                                              | Blautia                          | -         | 0.007      | 0.035     | -0.086 | 0.000      | -0.322 | 0.069 | -4.646 | 0.000      | -0.576 | 0.109 |
|              | Cluster_85                                             | Lachnoclostridium                | -         | 0.011      | 0.008     | -0.014 | 0.000      | -0.388 | 0.075 | -5.202 | 0.000      | -0.674 | 0.122 |
|              | Cluster_65                                             | Tyzzerella                       | -         | 0.017      | 0.004     | -0.011 | 0.000      | -0.711 | 0.177 | -4.019 | 0.042      | -1.323 | 0.355 |
|              | Cluster_186                                            | Ruminococcaceae UBA1819          | -         | 0.022      | 0.000     | -0.001 | 0.000      | -0.386 | 0.077 | -5.017 | 0.007      | -0.782 | 0.178 |
|              | Mother born in France (no vs yes)                      |                                  |           |            |           |        |            |        |       |        |            |        |       |
|              | Cluster_174                                            | Oscillospiraceae (unknown genus) | -         | 0.003      | 0.001     | -0.004 | 0.002      | -0.583 | 0.135 | -4.331 | 0.032      | -0.285 | 0.138 |
|              | otu.id                                                 | Family                           |           |            |           |        |            |        |       |        |            |        |       |
| Family level | Gestational age (<37 weeks of GA vs >= 37 weeks of GA) |                                  |           |            |           |        |            |        |       |        |            |        |       |
|              | Cluster_117                                            | Butyrivicoccaceae                | -         | 0.000      | 0.002     | -0.010 | 0.000      | -0.640 | 0.096 | -6.658 | 0.000      | -1.009 | 0.174 |
|              | Cluster_299                                            | Erysipelatoclostridiaceae        | -         | 0.000      | 0.000     | -0.003 | 0.000      | -0.665 | 0.088 | -7.550 | 0.000      | -1.590 | 0.254 |
|              | Household siblings (At least 1 vs none)                |                                  |           |            |           |        |            |        |       |        |            |        |       |
|              | Cluster_62                                             | Marinifilaceae                   | +         | 0.000      | 0.005     | 0.021  | 0.009      | 0.355  | 0.127 | 2.801  | 0.006      | 0.956  | 0.243 |
|              | Cluster_68                                             | Christensenellaceae              | +         | 0.000      | 0.008     | 0.070  | 0.000      | 0.718  | 0.142 | 5.072  | 0.000      | 1.449  | 0.267 |
|              | Cluster_79                                             | Barnesiellaceae                  | +         | 0.000      | 0.008     | 0.036  | 0.004      | 0.533  | 0.172 | 3.104  | 0.025      | 1.241  | 0.345 |
|              | Cluster_1                                              | Bacteroidaceae                   | -         | 0.003      | 0.300     | -0.454 | 0.000      | -0.491 | 0.067 | -7.300 | 0.000      | -0.550 | 0.104 |

LDM: mean.freq= the mean relative abundance of taxa in the tested category, beta= effect size.

ANCOM-BC: beta= coefficient obtained from the ANCOM-BC log linear (natural log) model (log-transformed change in abundance), se = standard error of the beta, W = test statistic (beta/se).

ALDEx2: beta= per-feature effect size, se= standard error of the beta. Direction: - = less abundant taxa in the category compared to the reference, + = more abundant taxa in the category compared to the reference. adj.pvalue = False discovery rate (FDR) adjusted p-value.

The relative abundance of the *Bifidobacterium* genus was significantly different between preterm and full-term children according to both LDM and ANCOM-BC methods (FDR p = 0.037 and FDR p = 0.01 respectively). However, no difference was observed according to ALDEx2 method (FDR p = 0.68).

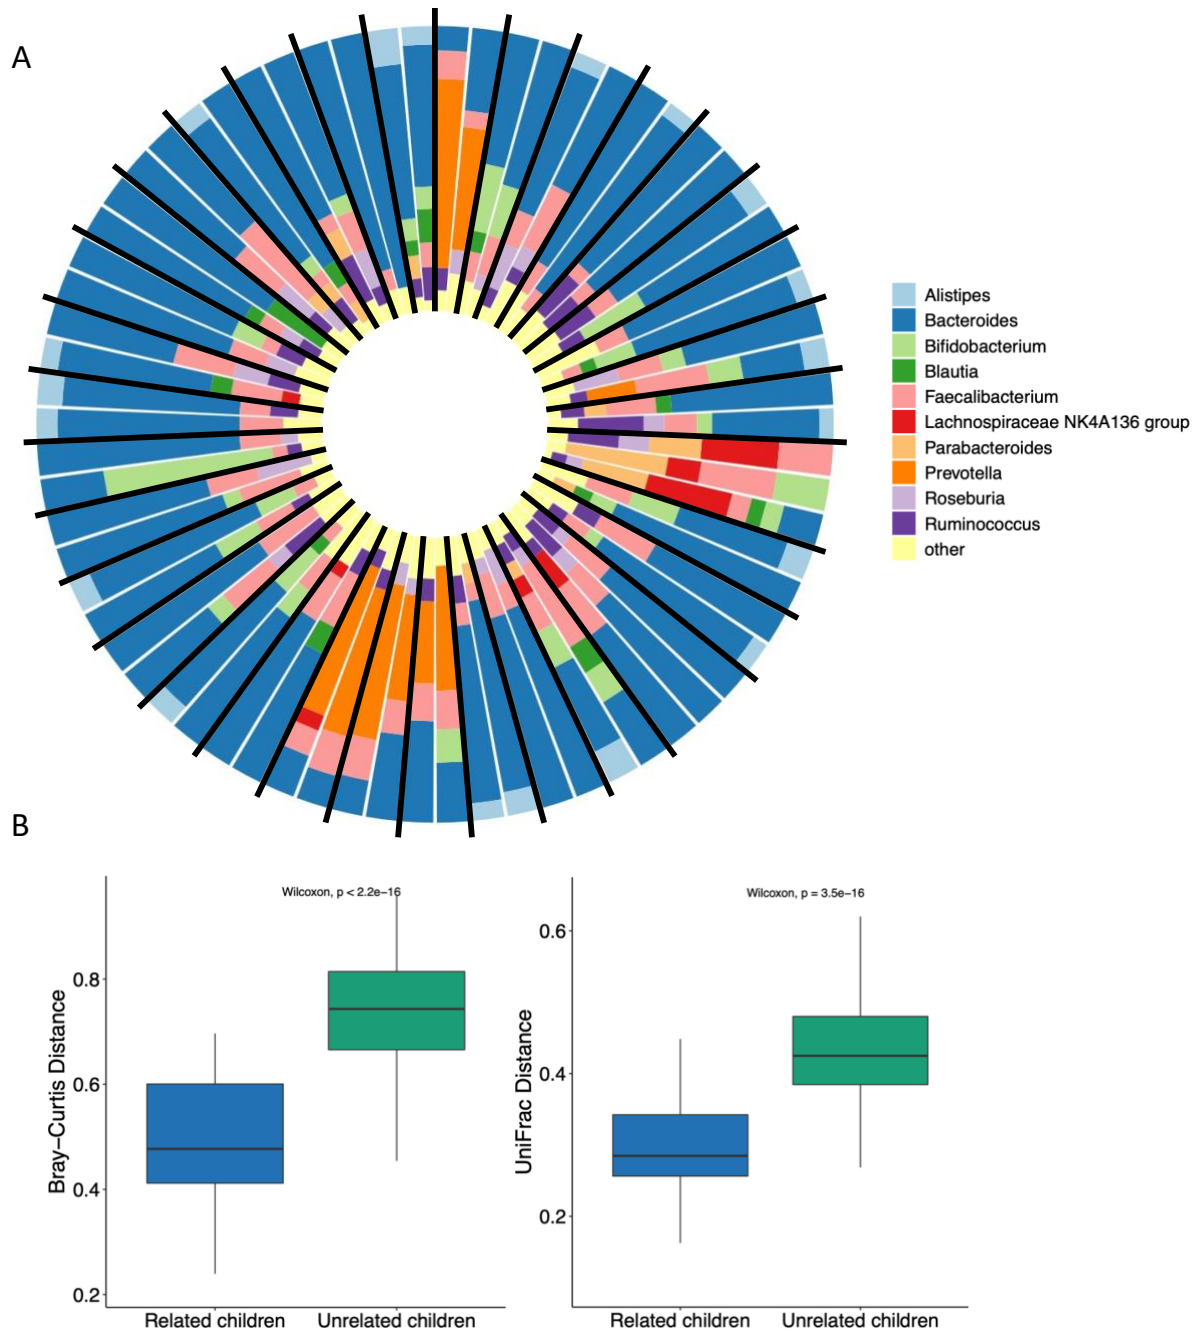

**Figure S1. Relatedness of gut microbiota at 3.5 years of age in related EPIPAGE2 children.** **A** Barplots showing the relative abundance of the top 10 genus in the gut microbiota of the 36 EPIPAGE 2 children that have a related sibling in the cohort. Bars between two dark lines referred to a set of related children (twins or triplets). **B** Pairwise beta diversity distances between related and unrelated children according to both Bray-Curtis and UniFrac distances. Significant differences were assessed by Wilcoxon rank sum test.

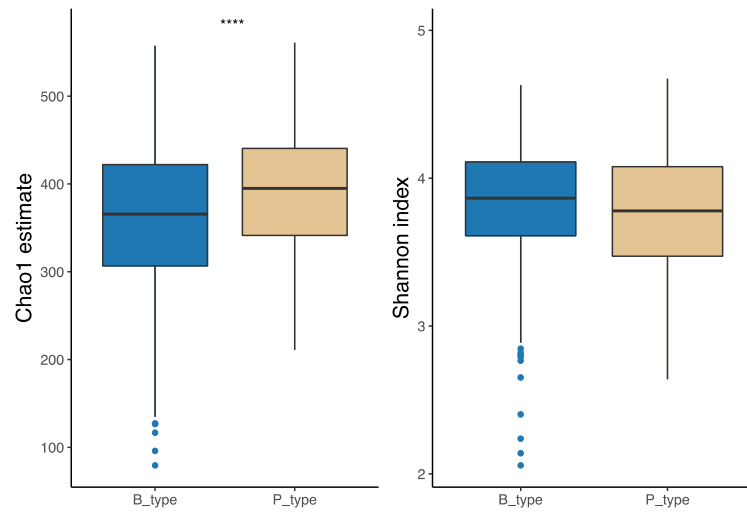

**Figure S2. Alpha diversity across enterotypes.** Boxplot of alpha diversity assessed by Chao1 estimate (left) and Shannon index (right) based on the OTU taxonomic profile between B\_type and P\_type enterotypes. (\*\*\*\* $p \leq 0.0001$ ). The boxplots show the smallest and largest values, 25% and 75% quartiles, the median, and outliers.
